# Supplementary material for: Stakeholders perspectives of barriers and facilitators of childhood obesity prevention policies in Iran: A Delphi method study
Source: Springer Nature journal article supplement (doi:10.1186/s12889-021-12282-7), 2021-12-01

# AVA

## AVA LANGUAGE CENTER

**December 25, 2020**  
**To Whom It May Concern,**

Hereby it is confirmed that the paper entitled "**Barriers and facilitators of childhood obesity prevention policies in Iran: A Delphi method study**" by *Rahim Khodayari-Zarnaq* has been copy-edited by an editor of this center.

It seems that the paper enjoys a good quality in terms of writing, syntax, and semantics. The center cannot comment on the contents of the paper or anything else related to the topic of the study.

Sincerely,  
Amir Shojaei  
Supervisor of Ava Language Center  
Tel: +989379809313 / [avalc@yahoo.com](mailto:avalc@yahoo.com)

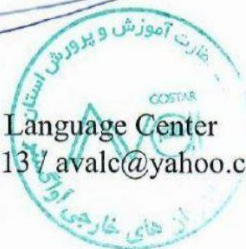

Supplement: MOESM1 [file 19950788]
